# Supplementary material
Source: Springer Nature journal article supplement (https://www.springermedizin.de/resource/supplementary/12891_2006_225_MOESM1_ESM.pdf/9510784)

Review: New review (Version 02)  
 Comparison: 01 PEME vs Placebo  
 Outcome: 01 PAIN

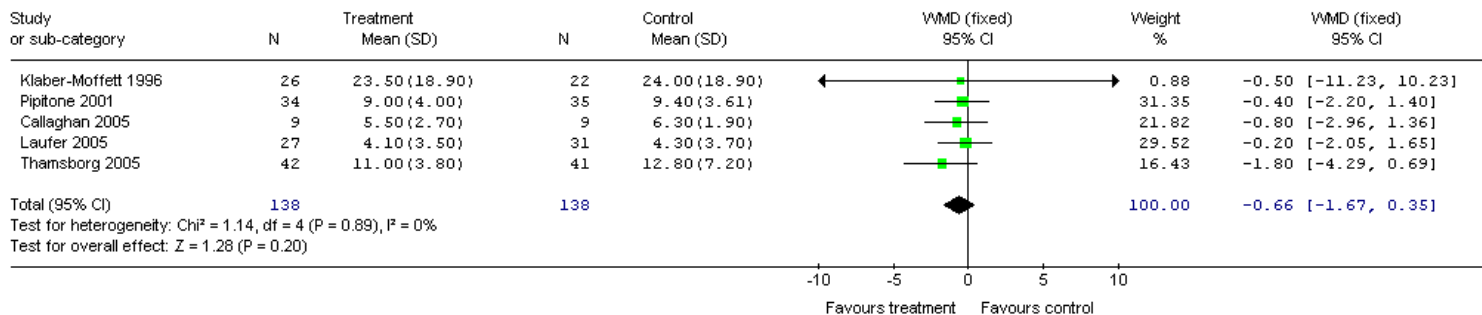

Review: New review (Version 02)  
 Comparison: 01 PEME vs Placebo  
 Outcome: 02 FUNCTION

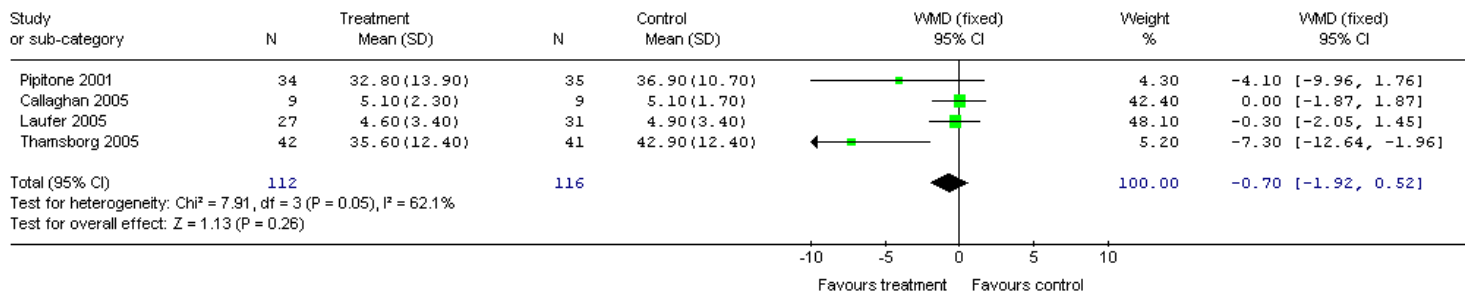

Supplement: MOESM1 [file 9510784]
